# Supplementary material
Source: PubMed Central journal article supplement (PMC6419583)
Supplement: mmc6.pdf [file mmc6.pdf]

## Supplemental Figure 6

A

*Metastatic Melanoma FFPE Samples*

|              |        | <u>Sanger/SNaPshot</u> |    |
|--------------|--------|------------------------|----|
|              |        | Mutant                 | WT |
| <u>ddPCR</u> | Mutant | 19                     | 0  |
|              | WT     | 0                      | 15 |

B

*Plasma of Known Mutant FFPE*

|               |        | <u>FFPE</u> |    |
|---------------|--------|-------------|----|
|               |        | Mutant      | WT |
| <u>Plasma</u> | Mutant | 21          | 0  |
|               | WT     | 6           | 12 |
