# Supplementary material
Source: PubMed Central journal article supplement (PMC6419583)

# Supplemental Figure 1

## EDTA Titration

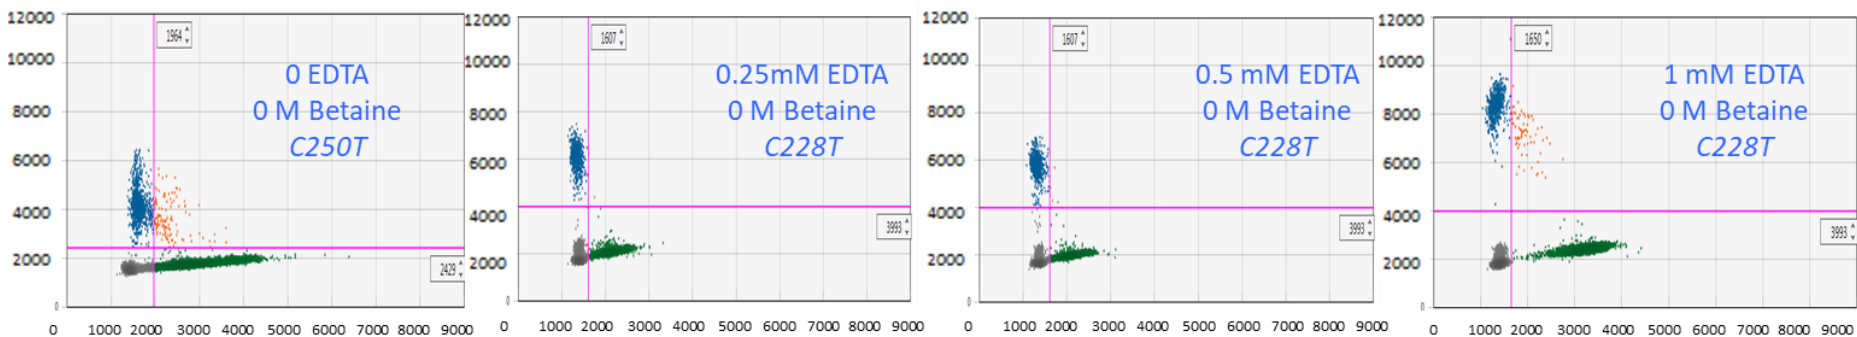

## Betaine Titration w/ Established EDTA

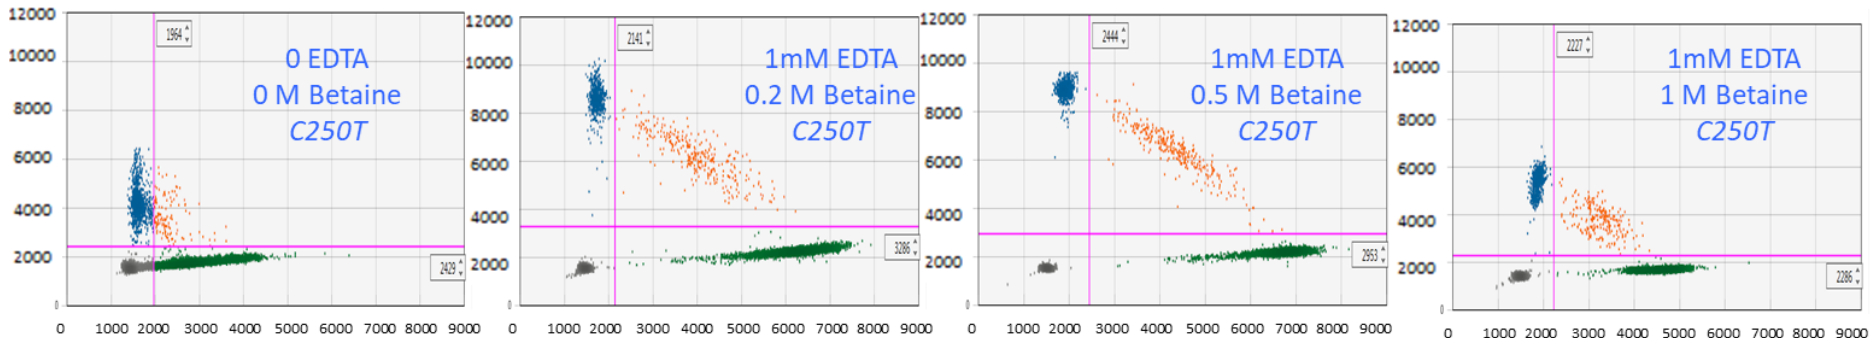

Supplement: mmc1.pdf [file mmc1.pdf]

# Supplemental Figure 2

**A**

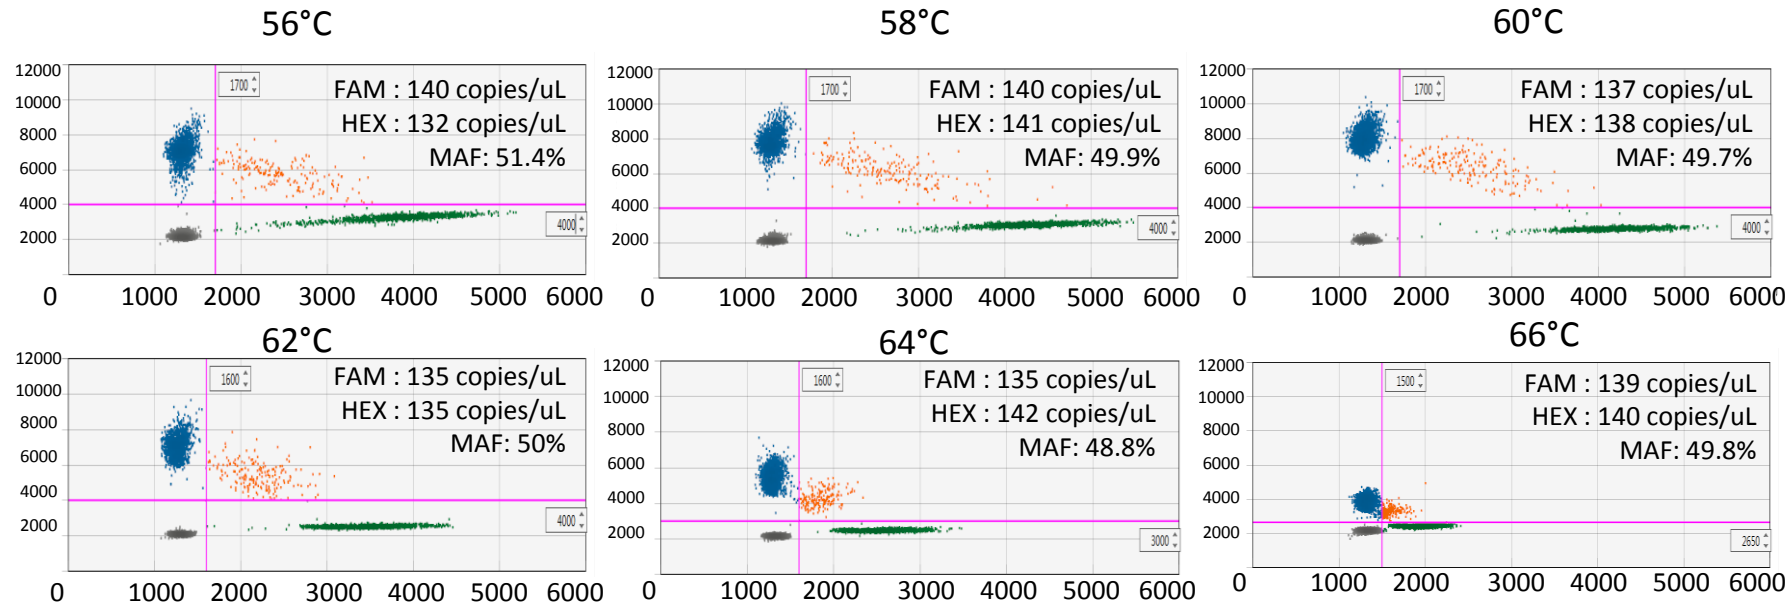

**B**

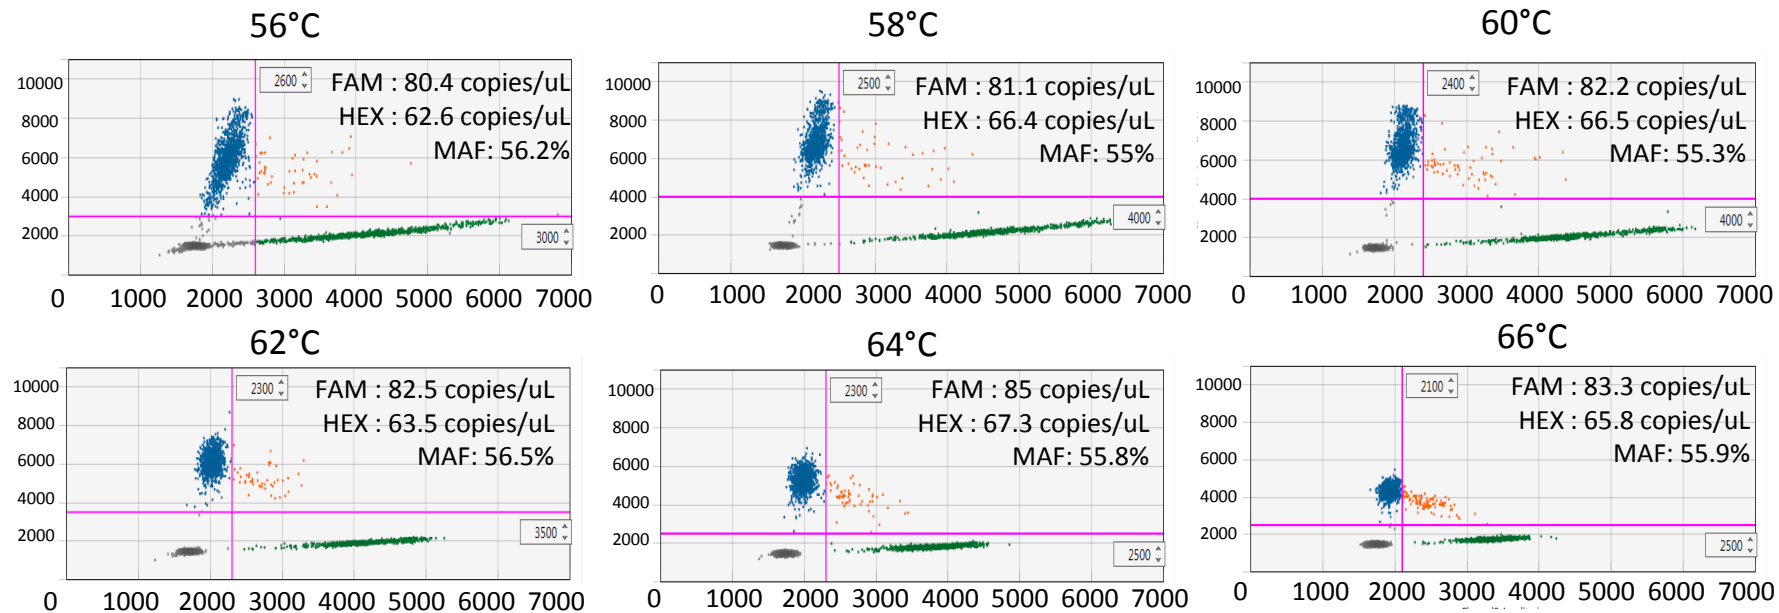

Supplement: mmc2.pdf [file mmc2.pdf]

# Supplemental Figure 3

## WT TERT copies as % of "No Betaine Control"

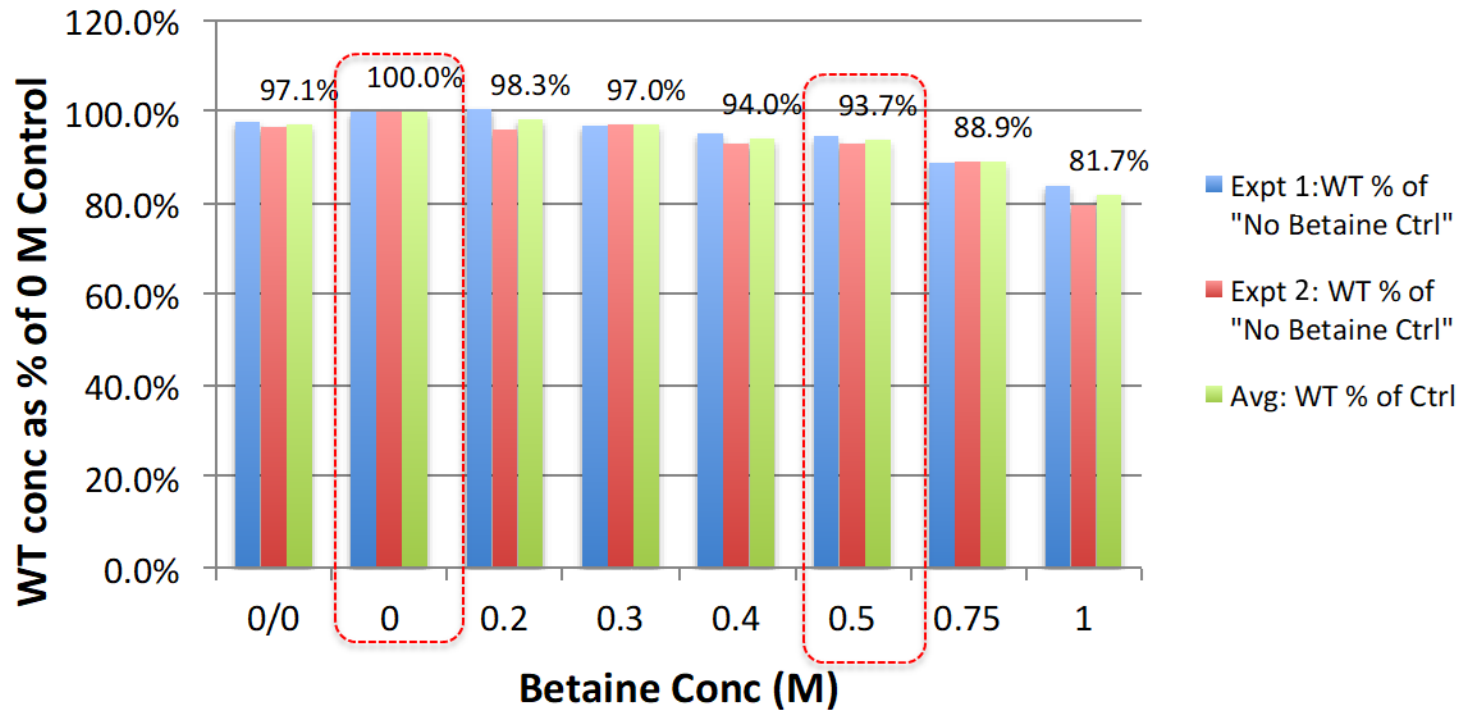

Supplement: mmc3.pdf [file mmc3.pdf]

## Supplemental Figure 4

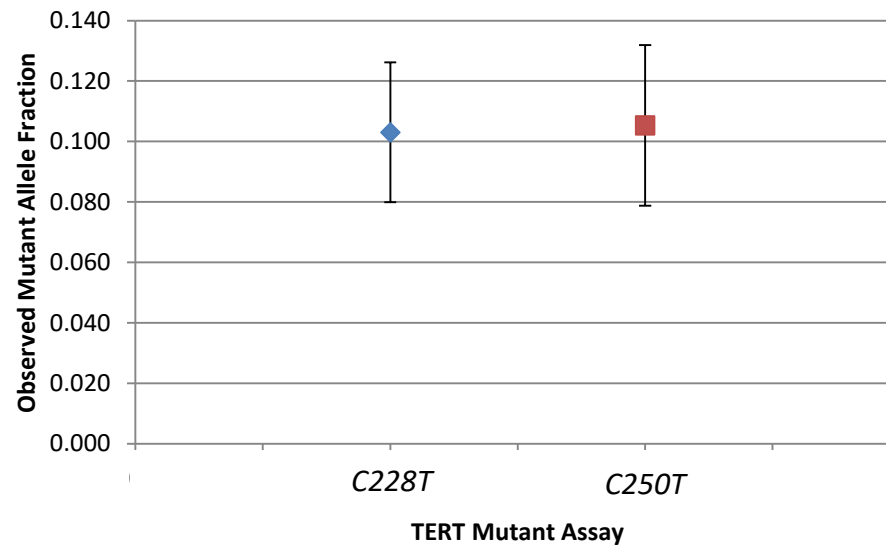

Supplement: mmc4.pdf [file mmc4.pdf]

# Supplemental Figure 5

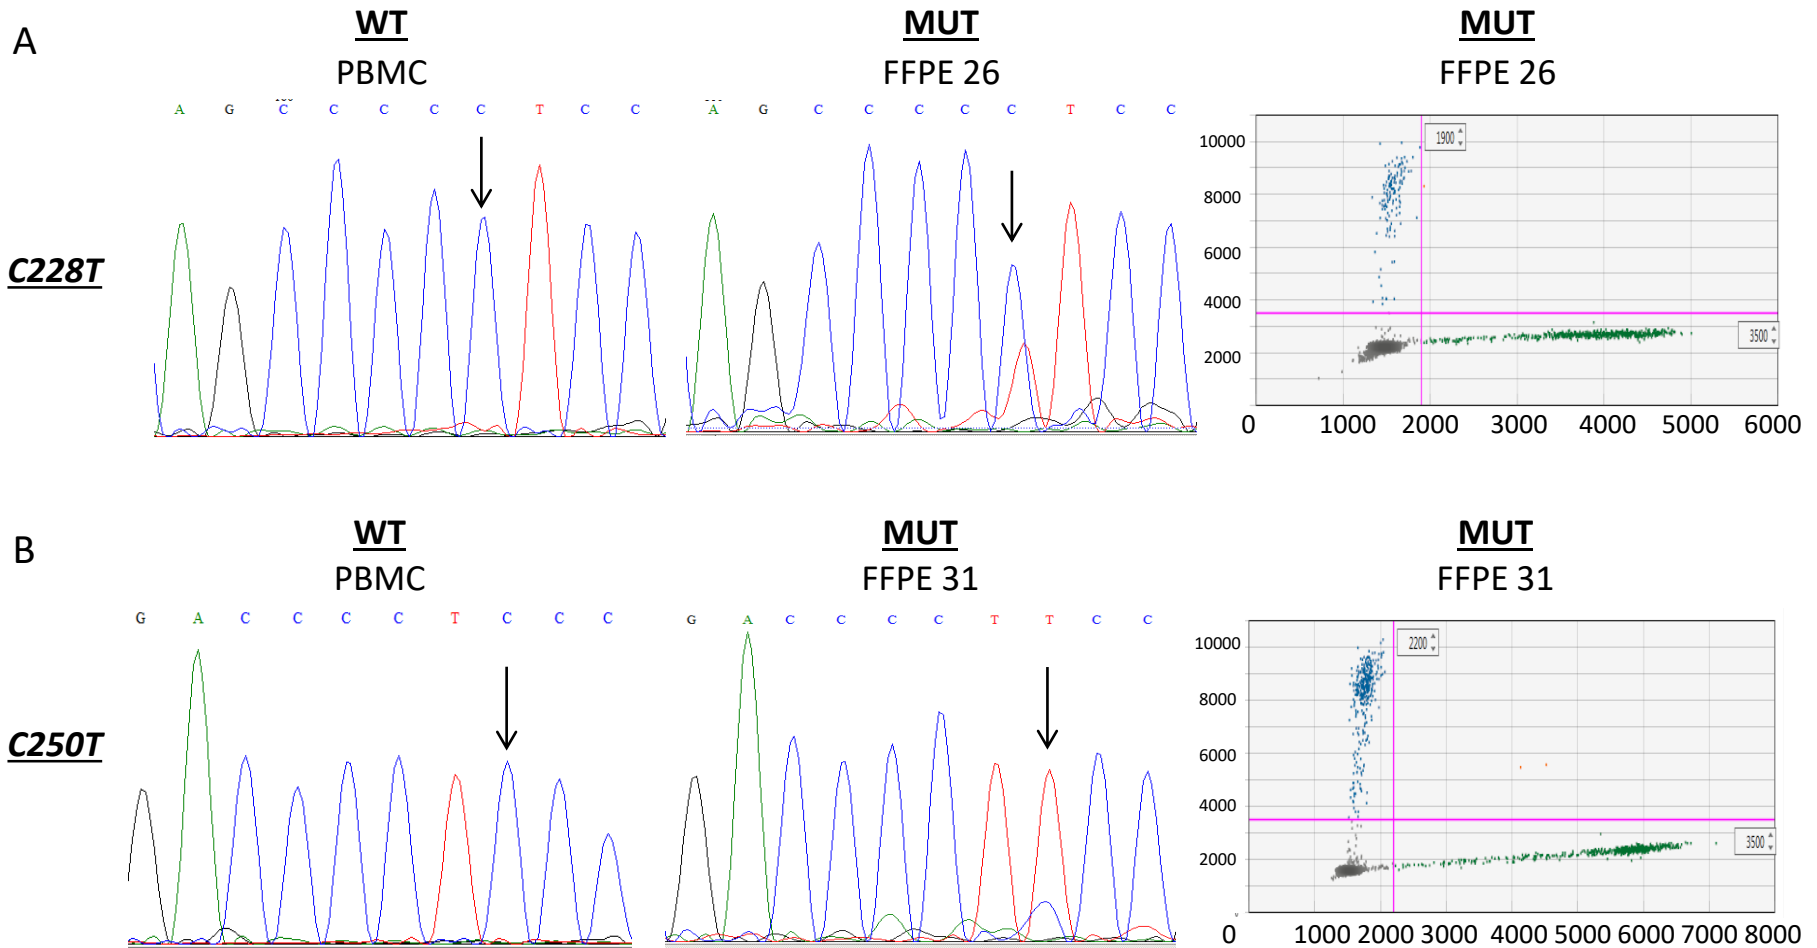

Supplement: mmc5.pdf [file mmc5.pdf]

## Supplemental Figure 7

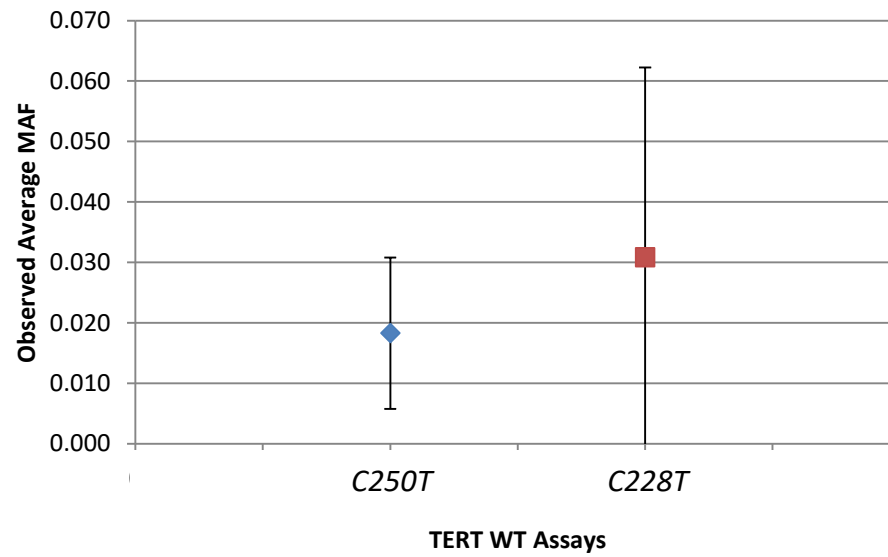

Supplement: mmc7.pdf [file mmc7.pdf]

# Supplemental Figure 8

## C228T Plasma Samples

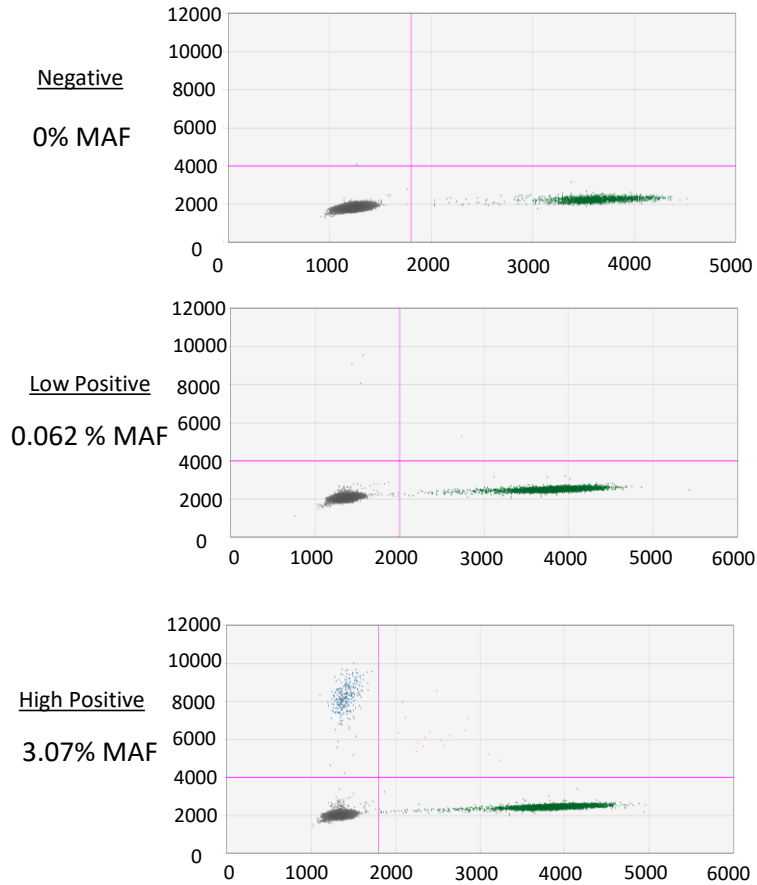

## C250T Plasma Samples

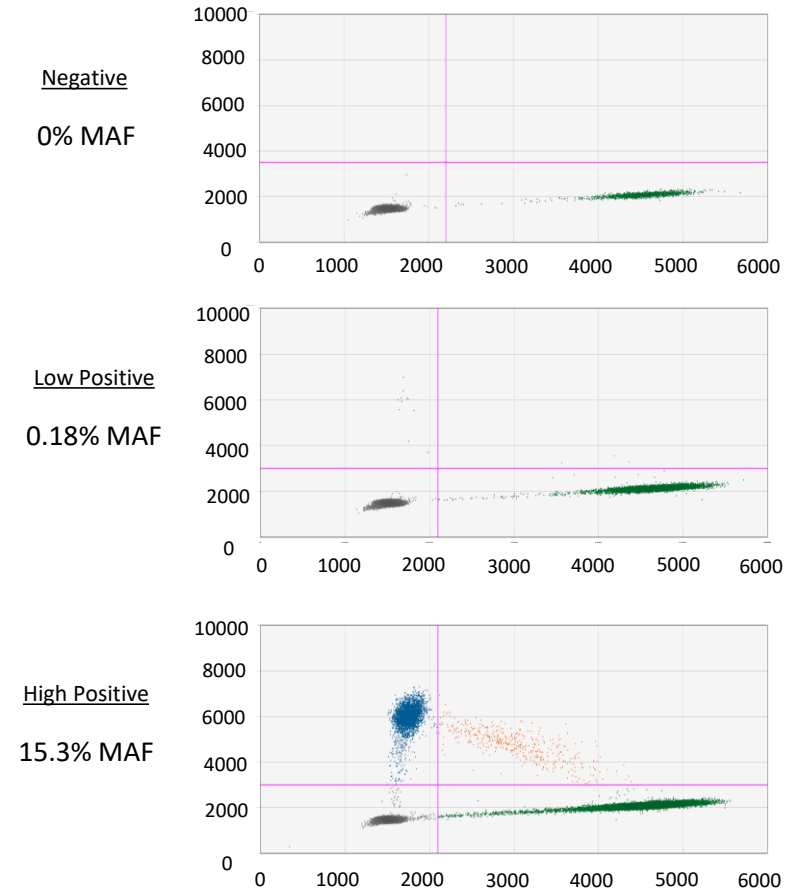

Supplement: mmc8.pdf [file mmc8.pdf]
